# Supplementary material
Source: ML conference proceedings conference paper supplement (https://openaccess.thecvf.com/content/WACV2023/html/Babu_No_Reference_Opinion_WACV_2023_paper.html)
Supplement: Supplementary file 1 [file Babu_No_Reference_Opinion_WACV_2023_supplemental.pdf]

# Supplementary Material: No Reference Opinion Unaware Quality Assessment of Authentically Distorted Images

Nithin C Babu<sup>1</sup>, Vignesh Kannan<sup>2</sup>, and Rajiv Soundararajan<sup>1</sup>

<sup>1</sup>Indian Institute of Science, Bengaluru, India

<sup>2</sup>Mercedes-Benz Research and Development India

nithinc@iisc.ac.in, vigneshkannan1696@gmail.com, rajivs@iisc.ac.in

## A. Steps to obtain the variational approximation loss

Our proposed optimization problem for variational approximation is

$$\min_{\theta} [\text{KL}(p(Y_k, Z_k) \| q_{\theta}(Y_k, Z_k)) - \text{KL}(p(Y_k)p(Z_k) \| q_{\theta}(Y_k, Z_k))]. \quad (1)$$

Following Theorem 3.2 in [1], defining  $q_{\theta}(Y_k, Z_k) = q_{\theta}(Y_k|Z_k)p(Z_k)$ , we can rewrite the above term as

$$\min_{\theta} \left\{ \mathbb{E}_{p(Y_k, Z_k)} \left[ \log \left( \frac{p(Y_k|Z_k)p(Z_k)}{q_{\theta}(Y_k|Z_k)p(Z_k)} \right) \right] - \mathbb{E}_{p(Y_k)p(Z_k)} \left[ \log \left( \frac{p(Y_k)p(Z_k)}{q_{\theta}(Y_k|Z_k)p(Z_k)} \right) \right] \right\}. \quad (2)$$

Removing the terms that do not depend on the parameter  $\theta$ , the optimization problem reduces to

$$\max_{\theta} [\mathbb{E}_{p(Y_k, Z_k)} [\log q_{\theta}(Y_k|Z_k)] - \mathbb{E}_{p(Y_k)p(Z_k)} [\log q_{\theta}(Y_k|Z_k)]]. \quad (3)$$

Similar to [1], we can use samples to obtain the following unbiased estimate of the objective function to be maximized as

$$\mathcal{L}_{\theta_k} = \frac{1}{N} \sum_{n=1}^N \log q_{\theta}(y_k^{(n)} | z_k^{(n)}) - \frac{1}{N^2} \sum_{n=1}^N \sum_{m=1}^N \log q_{\theta}(y_k^{(m)} | z_k^{(n)}). \quad (4)$$

$$\mathcal{L}_{\theta_k} = \frac{1}{N} \sum_{n=1}^N \left[ \log q_{\theta}(y_k^{(n)} | z_k^{(n)}) - \frac{1}{N} \sum_{m=1}^N \log q_{\theta}(y_k^{(m)} | z_k^{(n)}) \right]. \quad (5)$$

## References

- [1] Pengyu Cheng, Weituo Hao, Shuyang Dai, Jiachang Liu, Zhe Gan, and Lawrence Carin. Club: A contrastive log-ratio upper bound of mutual information. In *International conference on machine learning*, pages 1779–1788. PMLR, 2020.
